# Supplementary material
Source: PubMed Central journal article supplement (PMC5044840)
Supplement: JVI.01235-16_zjv999181990so2.pdf [file JVI.01235-16_zjv999181990so2.pdf]

## **Supplemental Material**

### **Movie S1. Live-cell imaging of EBV BFRF1-induced vesicle formation from NE.**

HeLa cells were transfected with plasmid expressing CFP-BFRF1 and subjected to time-lapse imaging analysis using a Zeiss Axiovert 200M Inverted Microscope and an environmental chamber. The continuous fluorescent images of the cell in Fig. 1G, II were captured from 8 to 20 h post transfection with 10 min intervals (indicated by h: min).
